# Supplementary material for: Integrative Genomic and Transcriptomic Profiling Reveals a Differential Molecular Signature in Uterine Leiomyoma versus Leiomyosarcoma
Source: MDPI journal article supplement (doi:10.3390/ijms23042190), 2022-02-16
Supplement: s1 [file s1]

**Supplementary Table S1.** Pathogenic and likely pathogenic variants detected in the most frequently affected genes in leiomyosarcoma (LMS), based on HUGO Gene Nomenclature Committee and the Catalogue of Somatic Mutations in Cancer (HGVS: HGVS coding sequence name; HGVS: HGVS protein sequence name).

| LM         |           |     |     |                           |           |                                 |                          |                                                                                                                                                   |
|------------|-----------|-----|-----|---------------------------|-----------|---------------------------------|--------------------------|---------------------------------------------------------------------------------------------------------------------------------------------------|
| Chromosome | Position  | Ref | Alt | Mutation                  | n_samples | SIFT                            | PolyPhen                 | COSMIC                                                                                                                                            |
| 12         | 53012128  | C   | T   | KRT73-c.181G>A            | 9         | tolerated(0.17)                 | benign(0.01)             | -                                                                                                                                                 |
| 1          | 247024326 | G   | A   | AHCTF1-c.4034C>T          | 8         | tolerated(0.24)                 | benign(0.003)            | <a href="https://cancer.sanger.ac.uk/cosmic/mutation/overview?id=103887737">https://cancer.sanger.ac.uk/cosmic/mutation/overview?id=103887737</a> |
| 22         | 40283427  | A   | G   | ENTHD1-c.326T>C           | 8         | deleterious(0.02)               | probably_damaging(0.909) | <a href="https://cancer.sanger.ac.uk/cosmic/mutation/overview?id=102996182">https://cancer.sanger.ac.uk/cosmic/mutation/overview?id=102996182</a> |
| 16         | 684579    | C   | T   | METTL26-c.565G>A          | 8         | -                               | -                        | <a href="https://cancer.sanger.ac.uk/cosmic/mutation/overview?id=120485433">https://cancer.sanger.ac.uk/cosmic/mutation/overview?id=120485433</a> |
| 6          | 138491807 | G   | A   | ARFGEF3-c.94G>A           | 7         | tolerated(0.54)                 | -                        | <a href="https://cancer.sanger.ac.uk/cosmic/mutation/overview?id=101534468">https://cancer.sanger.ac.uk/cosmic/mutation/overview?id=101534468</a> |
| 5          | 118480316 | G   | A   | DMXL1-c.2552G>A           | 7         | tolerated(0.57)                 | -                        | -                                                                                                                                                 |
| 21         | 46047779  | G   | A   | KRTAP10-9-c.691G>A        | 7         | -                               | -                        | -                                                                                                                                                 |
| 1          | 150280621 | T   | G   | MRPS21-c.223T>G           | 7         | -                               | possibly_damaging(0.635) | <a href="https://cancer.sanger.ac.uk/cosmic/mutation/overview?id=163046164">https://cancer.sanger.ac.uk/cosmic/mutation/overview?id=163046164</a> |
| 13         | 111279817 | A   | G   | NAXD-c.418A>G             | 7         | tolerated(0.32)                 | benign(0.034)            | <a href="https://cancer.sanger.ac.uk/cosmic/mutation/overview?id=102878237">https://cancer.sanger.ac.uk/cosmic/mutation/overview?id=102878237</a> |
| 5          | 140531700 | A   | G   | PCDHB6-c.1862A>G          | 7         | deleterious_low_confidence(0.0) | probably_damaging(0.962) | -                                                                                                                                                 |
| 4          | 57797467  | C   | T   | REST-c.2443C>T            | 7         | tolerated_low_confidence(0.27)  | benign(0.001)            | -                                                                                                                                                 |
| 6          | 4995464   | C   | T   | RPP40-c.940G>A            | 7         | deleterious(0)                  | probably_damaging(0.953) | <a href="https://cancer.sanger.ac.uk/cosmic/mutation/overview?id=114510553">https://cancer.sanger.ac.uk/cosmic/mutation/overview?id=114510553</a> |
| LMS        |           |     |     |                           |           |                                 |                          |                                                                                                                                                   |
| Chromosome | Position  | Ref | Alt | Mutation                  | n_samples | SIFT                            | PolyPhen                 | COSMIC                                                                                                                                            |
| 19         | 3982930   | CG  | GCC | EEF2-c.486_487delCGinsGGC | 7         | -                               | -                        | -                                                                                                                                                 |

|    |                   |          |   |                                     |   |                                                 |   |                                                                                                                                                   |
|----|-------------------|----------|---|-------------------------------------|---|-------------------------------------------------|---|---------------------------------------------------------------------------------------------------------------------------------------------------|
| 12 | 6646<br>851       | C        | A | GAPDH-<br>c.627C>A                  | 7 | -                                               | - | -                                                                                                                                                 |
| 22 | 3201<br>9810      | T        | A | PISD-c.58C>T                        | 7 | -                                               | - | <a href="https://cancer.sanger.ac.uk/cosmic/mutation/overview?id=116284707">https://cancer.sanger.ac.uk/cosmic/mutation/overview?id=116284707</a> |
| 22 | 3201<br>9831      | G        | A | PISD-c.79A>T                        | 7 | -                                               | - | -                                                                                                                                                 |
| 2  | 9347<br>277       | A        | T | ASAP2-<br>c.44A>T                   | 6 | -                                               | - | <a href="https://cancer.sanger.ac.uk/cosmic/mutation/overview?id=102543185">https://cancer.sanger.ac.uk/cosmic/mutation/overview?id=102543185</a> |
| 9  | 1392<br>6220<br>5 | C        | G | CARD9-<br>c.1153G>C                 | 6 | -                                               | - | -                                                                                                                                                 |
| 18 | 5258<br>6545      | A        | G | CCDC68-<br>c.746T>C                 | 6 | probably_da<br>deleterious(0) maging(0.96<br>2) | - | -                                                                                                                                                 |
| 12 | 6646<br>831       | C        | G | GAPDH-<br>c.607C>G                  | 6 | -                                               | - | -                                                                                                                                                 |
| 12 | 6646<br>832       | T        | C | GAPDH-<br>c.608T>C                  | 6 | -                                               | - | -                                                                                                                                                 |
| 3  | 1594<br>8227<br>1 | GGC<br>A | G | IQCI-SCHIP1-<br>c.349_351del<br>AGC | 6 | -                                               | - | <a href="https://cancer.sanger.ac.uk/cosmic/mutation/overview?id=137467219">https://cancer.sanger.ac.uk/cosmic/mutation/overview?id=137467219</a> |
| 1  | 2284<br>5639<br>8 | G        | T | OBSCN-<br>c.5581G>T                 | 6 | -                                               | - | -                                                                                                                                                 |
| 1  | 2284<br>5639<br>9 | T        | C | OBSCN-<br>c.5582T>C                 | 6 | -                                               | - | -                                                                                                                                                 |
| 1  | 2284<br>5640<br>7 | A        | T | OBSCN-<br>c.5590A>T                 | 6 | -                                               | - | <a href="https://cancer.sanger.ac.uk/cosmic/mutation/overview?id=160852259">https://cancer.sanger.ac.uk/cosmic/mutation/overview?id=160852259</a> |

**Supplementary Table S2** Most frequent copy number variants (CNVs) in the leiomyosarcoma (LMS) group (detected in at least 25% of LMS samples and in no leiomyoma samples).

| Start     | End       | Chr | CNV type    | Number of copies | Number of affected genes | Size     | Frequency in LMS (%) |
|-----------|-----------|-----|-------------|------------------|--------------------------|----------|----------------------|
| 27467015  | 29412601  | 2   | Deletion    | 1                | 33                       | 1945586  | 29.41                |
| 214015545 | 215592774 | 2   | Deletion    | 1                | 3                        | 1577229  | 35.29                |
| 216003542 | 225338338 | 2   | Deletion    | 1                | 86                       | 9334796  | 32.35                |
| 29042365  | 32889966  | 13  | Deletion    | 1                | 17                       | 3847601  | 41.18                |
| 29470725  | 30947263  | 20  | Duplication | 3                | 28                       | 1476538  | 32.35                |
| 134109653 | 135770995 | 9   | Deletion    | 1                | 16                       | 1661342  | 29.41                |
| 105206773 | 112327712 | 10  | Deletion    | 1                | 24                       | 7120939  | 29.41                |
| 112364698 | 123238463 | 10  | Deletion    | 1                | 62                       | 10873765 | 38.24                |
| 126524163 | 129896831 | 10  | Deletion    | 1                | 16                       | 3372668  | 29.41                |
| 129924556 | 135339987 | 10  | Deletion    | 1                | 31                       | 5415431  | 32.35                |
| 27494592  | 29482393  | 17  | Duplication | 3                | 26                       | 1987801  | 29.41                |
| 56812191  | 59760035  | 17  | Duplication | 3                | 27                       | 2947844  | 32.35                |

**Supplementary Table S3.** Quality control and metrics data obtained from whole-exome sequencing outcomes for leiomyoma (LM) and leiomyosarcoma (LMS) samples.

| Sample name |      | Raw Bases gb | Aligned Bases gb | On target perc | Mean cov | gte10 | Mean cov hem | gte100 hem |
|-------------|------|--------------|------------------|----------------|----------|-------|--------------|------------|
| LM          | 8LM  | 19.6         | 12.8             | 75.8           | 145.4    | 98    | 840.3        | 99.8       |
|             | 15LM | 12.5         | 9.9              | 78.2           | 123      | 97.6  | 427.1        | 99.5       |
|             | 16LM | 19.7         | 15.5             | 79.6           | 194.6    | 98.3  | 708.2        | 99.9       |
|             | 17LM | 10           | 8.1              | 78             | 99.6     | 96.8  | 355.6        | 98.8       |
|             | 18LM | 15           | 9.7              | 85             | 132.2    | 97.5  | 495.1        | 99         |
|             | 19LM | 13.4         | 11               | 69.9           | 114.3    | 96.8  | 428.4        | 98.2       |
|             | 21LM | 13.8         | 9.3              | 79.5           | 114.6    | 97.4  | 443          | 99         |
|             | 22LM | 21.6         | 17.4             | 82.9           | 231.7    | 98.3  | 820.8        | 99.8       |
|             | 23LM | 14.5         | 11.2             | 77.9           | 136.4    | 98    | 474.2        | 99.7       |
|             | 24LM | 12.8         | 8.7              | 83.3           | 115.4    | 97.2  | 453.8        | 98.9       |
|             | 25LM | 26.2         | 20.2             | 83.3           | 269.1    | 98.5  | 966.2        | 99.9       |
|             | 28LM | 13.8         | 10.8             | 78.3           | 134.5    | 97.8  | 470          | 99.6       |
|             | 30LM | 14.8         | 11.4             | 78.2           | 140.3    | 98.2  | 490.7        | 99.7       |
|             | 31LM | 13.4         | 10.7             | 76.5           | 129.5    | 97.6  | 440          | 99.5       |
|             | 32LM | 27.9         | 22.5             | 82.2           | 296.7    | 98.4  | 1667         | 99.9       |
|             | 34LM | 19.9         | 15.1             | 81.1           | 195.5    | 98.3  | 676.3        | 99.8       |
|             | 35LM | 21.5         | 16.8             | 82             | 220.3    | 98.3  | 1191.9       | 99.9       |

|  |      |      |      |      |       |      |        |      |
|--|------|------|------|------|-------|------|--------|------|
|  | 36LM | 20.2 | 16   | 83.2 | 215.3 | 98.3 | 803.9  | 99.8 |
|  | 41LM | 23.6 | 18.2 | 82   | 238.8 | 98.3 | 1288.6 | 99.9 |
|  | 44LM | 21.5 | 14.6 | 85.3 | 198.5 | 98.1 | 757    | 99.7 |
|  | 46LM | 20.5 | 17.5 | 86.3 | 244.6 | 98.3 | 947.3  | 99.8 |
|  | 47LM | 21.5 | 14.5 | 83.6 | 194.1 | 98.1 | 766.6  | 99.5 |
|  | 48LM | 13.6 | 11.5 | 83.6 | 154.8 | 98.1 | 608.2  | 99.7 |
|  | 49LM | 12.8 | 8.8  | 83.7 | 118.6 | 97.6 | 467.6  | 99.1 |
|  | 52LM | 15.9 | 11.1 | 85.3 | 152.1 | 97.4 | 582    | 98.7 |
|  | 54LM | 17.8 | 12.1 | 84.9 | 162.9 | 98   | 694.2  | 99.4 |
|  | 58LM | 12.7 | 8.8  | 87.1 | 121.8 | 97.7 | 494    | 99.2 |
|  | 59LM | 21.9 | 14.2 | 82.9 | 187.5 | 98.1 | 719    | 99.6 |
|  | 60LM | 14.3 | 9.6  | 84.6 | 127.6 | 97.6 | 535.5  | 99.1 |
|  | 61LM | 11.1 | 7.7  | 84.9 | 102.7 | 97.3 | 415    | 98.7 |
|  | 63LM | 13.8 | 11.7 | 86.3 | 158.3 | 97.9 | 662.6  | 99.6 |
|  | 65LM | 11.6 | 10   | 84.6 | 135.8 | 98   | 557.8  | 99.6 |
|  | 67LM | 18.5 | 16.1 | 80.6 | 208.8 | 98.2 | 796.8  | 99.7 |
|  | 68LM | 18.3 | 15.7 | 86.1 | 217.6 | 98.2 | 891.8  | 99.8 |
|  | 69LM | 11.6 | 10   | 88.3 | 141.2 | 97.9 | 579.9  | 99.5 |
|  | 71LM | 12.8 | 11   | 87   | 151.1 | 97.8 | 645.3  | 99.5 |
|  | 72LM | 12.8 | 11   | 86.8 | 153.3 | 98.1 | 635    | 99.6 |
|  | 73LM | 13   | 11   | 73.1 | 128   | 97.9 | 531    | 99.6 |
|  | 75LM | 10.1 | 8.3  | 79.3 | 98.7  | 96.4 | 371.8  | 97.9 |
|  | 76LM | 13.1 | 11.1 | 75.7 | 132.7 | 97.9 | 550.9  | 99.5 |

|     |       |      |      |      |       |      |        |      |
|-----|-------|------|------|------|-------|------|--------|------|
|     | 77LM  | 9.1  | 7.6  | 85.3 | 101.7 | 98.5 | 392.5  | 99.1 |
|     | 78LM  | 11.2 | 9.4  | 84.6 | 124   | 97.1 | 459.6  | 98.7 |
|     | 79LM  | 14.7 | 12.4 | 84.9 | 169.4 | 97.8 | 613    | 99.5 |
|     | 80LM  | 19.3 | 13.6 | 70   | 138.8 | 97.6 | 589.9  | 99.3 |
| LMS | LMS02 | 26.2 | 19.9 | 83.5 | 263.5 | 98.4 | 1558.2 | 99.9 |
|     | LMS03 | 38.2 | 19.6 | 79.3 | 236.6 | 98.3 | 1088.4 | 99.9 |
|     | LMS04 | 22.7 | 16.1 | 83.3 | 209.8 | 98.3 | 806.1  | 99.8 |
|     | LMS05 | 10.7 | 7.7  | 77   | 85.1  | 96.3 | 350.8  | 94.7 |
|     | LMS06 | 16.4 | 10   | 79.7 | 114.4 | 97.8 | 397.5  | 98.7 |
|     | LMS08 | 22.6 | 14   | 83.3 | 172   | 98.2 | 602.7  | 99.6 |
|     | LMS09 | 19.5 | 13.5 | 83.5 | 171.5 | 98.1 | 652.4  | 99.4 |
|     | LMS10 | 21.6 | 13.8 | 85.2 | 174.8 | 98.2 | 640.1  | 99.5 |
|     | LMS11 | 15.3 | 9.3  | 82.7 | 110.2 | 97.7 | 373.9  | 98.7 |
|     | LMS12 | 17.5 | 10.8 | 82.6 | 127.4 | 97.8 | 469.2  | 98.6 |
|     | LMS14 | 18   | 12.5 | 85.1 | 164   | 98.3 | 631.4  | 99.8 |
|     | LMS15 | 20.2 | 13.1 | 86.4 | 170.3 | 98.1 | 646    | 99.4 |
|     | LMS25 | 14.3 | 11.3 | 84.6 | 152.5 | 97.9 | 900.8  | 99.4 |
|     | LMS26 | 17.5 | 14.3 | 80.4 | 183.7 | 98   | 1021.6 | 99.8 |
|     | LMS31 | 21.5 | 14.8 | 83.6 | 192.2 | 98.2 | 703.1  | 99.7 |
|     | LMS32 | 14.9 | 10.5 | 83.4 | 134.6 | 98   | 517.6  | 99.5 |
|     | LMS33 | 22.7 | 16.4 | 83.8 | 217.6 | 98.4 | 808.5  | 99.8 |
|     | LMS34 | 8.4  | 6    | 76   | 66.6  | 95.8 | 251.8  | 95.1 |
|     | LMS35 | 12.5 | 8.3  | 84.7 | 109.8 | 96.7 | 408.3  | 97.9 |

|  |       |      |      |      |       |      |       |      |
|--|-------|------|------|------|-------|------|-------|------|
|  | LMS36 | 19.8 | 13.5 | 82.8 | 178   | 97.6 | 643.9 | 99.2 |
|  | LMS39 | 12.9 | 8.4  | 84.8 | 110.8 | 97.6 | 465.3 | 99.2 |
|  | LMS48 | 11.7 | 8.1  | 84.9 | 107.8 | 97.4 | 463.1 | 98.7 |
|  | LMS49 | 24.2 | 16.1 | 66   | 157.4 | 98   | 612.9 | 99.4 |
|  | LMS50 | 11.9 | 8.5  | 85.5 | 113   | 97.4 | 482.3 | 99   |
|  | LMS52 | 10.5 | 8.5  | 81.4 | 106.7 | 97.6 | 420.3 | 99.3 |
|  | LMS53 | 13.3 | 8.9  | 79.8 | 110.8 | 97.4 | 453.7 | 98.9 |
|  | LMS54 | 19.1 | 13.4 | 84.8 | 172.4 | 97.9 | 646.7 | 99.6 |
|  | LMS55 | 11.3 | 7.7  | 85   | 101.2 | 96.8 | 425.2 | 97.3 |
|  | LMS56 | 12.1 | 8    | 81.6 | 102.1 | 97.3 | 421.4 | 98.8 |
|  | LMS57 | 24.2 | 20.4 | 84   | 279.6 | 98.2 | 966.5 | 99.5 |
|  | LMS58 | 12.7 | 11   | 81.4 | 144.2 | 98   | 574.4 | 99.5 |
|  | LMS60 | 13.9 | 11.3 | 71.7 | 128.4 | 97.8 | 507   | 99.4 |
|  | LMS61 | 12.4 | 10   | 85.3 | 124.8 | 97.3 | 550.2 | 97.9 |
|  | LMS62 | 11.7 | 9.5  | 87.2 | 129.8 | 97.7 | 547.7 | 99.3 |

**Supplementary Table S4.** Primer sequences and fragment sizes from six mononucleotide repeat markers tested for microsatellite instability. In each case, the antisense primer was labeled with a fluorescent dye. D3S1260, a highly polymorphic dinucleotide repeat marker, was used as an internal control.

| Gene           | Primer     | Sequence               | Primer length (nt) | Fluorescent 5' label | Fragment size (pb) |
|----------------|------------|------------------------|--------------------|----------------------|--------------------|
| <i>BAT25</i>   | BAT25_FW   | TCGCCTCCAAGAATGTAAGT   | 20                 | VIC                  | 122–124            |
|                | BAT25_RV   | TCTGCATTTTAACTATGGCTC  | 21                 | -                    |                    |
| <i>BAT26</i>   | BAT26_FW   | TGACTACTTTTGACTTCAGCC  | 21                 | 6FAM                 | 116–117            |
|                | BAT26_RV   | AACCATTCAACATTTTAAACCC | 22                 | -                    |                    |
| <i>BAT40</i>   | BAT40_FW   | AGTCCATTTTATATCCTCAAGC | 22                 | PET                  | 142–146            |
|                | BAT40_RV   | GTAGAGCAAGACCACCTTG    | 19                 | -                    |                    |
| <i>NR21</i>    | NR21_FW    | TAAATGTATGTCTCCCCTGG   | 20                 | VIC                  | 98–99              |
|                | NR21_RV    | ATTCCTACTCCGCATTCACA   | 20                 | -                    |                    |
| <i>NR22</i>    | NR22_FW    | GAGGCTTGTCAAGGACATAA   | 20                 | 6FAM                 | 138–140            |
|                | NR22_RV    | AATTCGGATGCCATCCAGTT   | 20                 | -                    |                    |
| <i>NR27</i>    | NR27_FW    | AACCATGCTTGCAAACCACT   | 20                 | 6FAM                 | 86–87              |
|                | NR27_RV    | CGATAATACTAGCAATGACC   | 20                 | -                    |                    |
| <i>D3S1260</i> | D3S1260_FW | CTACCAGGGAAGCACTGTAG   | 20                 | 6FAM                 | 171–189            |
|                | D3S1260_RV | CATGTACCTGAGCACCTACTG  | 21                 | -                    |                    |



**Supplementary Table S5.** Sequencing reads aligned reads per sample, and percentage of aligned reads from RNAseq data for leiomyoma (LM) and leiomyosarcoma (LMS) samples.

| Sample |      | Number of reads | Number of aligned reads | % of aligned reads |
|--------|------|-----------------|-------------------------|--------------------|
| LM     | 8LM  | 53.300.426      | 46.541.932              | 87.32              |
|        | 15LM | 65.529.986      | 56.978.323              | 86.95              |
|        | 16LM | 85.795.012      | 75.602.565              | 88.12              |
|        | 17LM | 69.618.698      | 60.902.437              | 87.48              |
|        | 18LM | 74.612.844      | 65.607.074              | 87.93              |
|        | 19LM | 57.662.702      | 50.345.305              | 87.31              |
|        | 21LM | 65.951.562      | 57.760.378              | 87.58              |
|        | 22LM | 82.063.226      | 71.690.434              | 87.36              |
|        | 23LM | 30.637.470      | 26.881.316              | 87.74              |
|        | 24LM | 72.902.072      | 62.214.628              | 85.34              |
|        | 25LM | 56.371.092      | 48.856.825              | 86.67              |
|        | 28LM | 31.515.306      | 28.108.501              | 89.19              |
|        | 30LM | 25.013.202      | 22.654.457              | 90.57              |
|        | 31LM | 34.871.992      | 30.872.175              | 88.53              |
|        | 32LM | 69.500.458      | 59.325.591              | 85.36              |

|  |      |            |            |       |
|--|------|------------|------------|-------|
|  | 34LM | 73.270.816 | 61.364.308 | 83.75 |
|  | 35LM | 82.184.314 | 70.810.005 | 86.16 |
|  | 36LM | 59.771.062 | 51.976.916 | 86.96 |
|  | 41LM | 51.180.652 | 45.136.217 | 88.19 |
|  | 44LM | 39.804.674 | 21.327.344 | 53.58 |
|  | 46LM | 61.842.240 | 54.377.882 | 87.93 |
|  | 47LM | 74.899.898 | 66.009.280 | 88.13 |
|  | 48LM | 54.597.600 | 30.268.909 | 55.44 |
|  | 49LM | 80.485.526 | 71.583.827 | 88.94 |
|  | 52LM | 76.145.418 | 66.543.481 | 87.39 |
|  | 54LM | 42.774.568 | 23.859.654 | 55.78 |
|  | 58LM | 42.379.782 | 22.465.522 | 53.01 |
|  | 59LM | 49.091.420 | 41.439.295 | 84.41 |
|  | 60LM | 72.095.082 | 62.583.938 | 86.81 |
|  | 61LM | 67.285.822 | 41.427.881 | 61.57 |
|  | 63LM | 66.928.162 | 43.750.939 | 65.37 |
|  | 65LM | 65.902.554 | 40.279.641 | 61.12 |
|  | 67LM | 61.125.038 | 33.083.927 | 54.13 |
|  | 68LM | 55.827.354 | 29.349.836 | 52.57 |

|     |       |             |            |       |
|-----|-------|-------------|------------|-------|
|     | 69LM  | 45.628.616  | 29.674.570 | 65.04 |
|     | 71LM  | 77.011.662  | 65.226.952 | 84.70 |
|     | 72LM  | 80.215.932  | 69.039.847 | 86.07 |
|     | 73LM  | 80.904.648  | 69.345.396 | 85.71 |
|     | 75LM  | 78.473.002  | 67.033.600 | 85.42 |
|     | 76LM  | 40.300.066  | 32.986.612 | 81.85 |
|     | 77LM  | 71.785.384  | 62.063.848 | 86.46 |
|     | 78LM  | 66.605.266  | 54.956.005 | 82.51 |
|     | 79LM  | 78.608.486  | 60.267.161 | 76.67 |
|     | 80LM  | 56.010.968  | 31.296.128 | 55.88 |
| LMS | LMS02 | 41.750.886  | 36.415.123 | 87.22 |
|     | LMS03 | 142.681.492 | 90.092.661 | 63.14 |
|     | LMS04 | 32.354.842  | 26.666.861 | 82.42 |
|     | LMS05 | 56.453.814  | 40.291.087 | 71.37 |
|     | LMS08 | 57.906.670  | 39.567.628 | 68.33 |
|     | LMS10 | 68.118.260  | 49.848.943 | 73.18 |
|     | LMS11 | 57.647.630  | 36.358.360 | 63.07 |
|     | LMS12 | 49.080.458  | 32.132.976 | 65.47 |
|     | LMS13 | 71.048.488  | 49.513.691 | 69.69 |

|  |       |            |            |       |
|--|-------|------------|------------|-------|
|  | LMS14 | 69.820.774 | 48.478.309 | 69.43 |
|  | LMS15 | 58.169.588 | 37.827.683 | 65.03 |
|  | LMS25 | 84.796.512 | 71.949.840 | 84.85 |
|  | LMS26 | 89.645.476 | 73.993.376 | 82.54 |
|  | LMS31 | 65.520.994 | 55.784.574 | 85.14 |
|  | LMS32 | 24.717.496 | 22.122.159 | 89.50 |
|  | LMS33 | 38.324.476 | 32.035.429 | 83.59 |
|  | LMS34 | 25.328.238 | 21.103.488 | 83.32 |
|  | LMS35 | 67.985.942 | 50.329.993 | 74.03 |
|  | LMS36 | 39.985.408 | 33.867.641 | 84.70 |
|  | LMS38 | 79.790.396 | 50.499.342 | 63.29 |
|  | LMS39 | 41.089.440 | 25.453.881 | 61.95 |
|  | LMS42 | 53.981.420 | 36.320.049 | 67.28 |
|  | LMS43 | 56.251.340 | 36.568.996 | 65.01 |
|  | LMS44 | 55.805.988 | 35.874.879 | 64.29 |
|  | LMS48 | 59.323.790 | 42.585.583 | 71.79 |
|  | LMS49 | 31.311.200 | 23.095.141 | 73.76 |
|  | LMS52 | 33.244.482 | 27.934.507 | 84.03 |
|  | LMS53 | 55.294.234 | 45.755.979 | 82.75 |

|  |       |            |            |       |
|--|-------|------------|------------|-------|
|  | LMS55 | 67.359.888 | 59.064.518 | 87.69 |
|  | LMS56 | 74.670.280 | 63.654.547 | 85.25 |
|  | LMS57 | 41.339.950 | 35.229.905 | 85.22 |
|  | LMS60 | 75.111.574 | 65.884.117 | 87.72 |
|  | LMS61 | 67.587.936 | 58.056.347 | 85.90 |
|  | LMS62 | 65.927.122 | 56.085.851 | 85.07 |

**Supplementary Table S6.** Primers for RT-qPCR validation, including the most differentially expressed genes identified from RNAseq data.

| Gene         | Primer   | Sequence              | Primer length (nt) | GC content (%) | Tm (°C) | Amplicon size (nt) |
|--------------|----------|-----------------------|--------------------|----------------|---------|--------------------|
| <i>SPAG5</i> | SPAG5_FW | AGTGCTTTACCCGAGTAGC   | 20                 | 55             | 60.04   | 163                |
|              | SPAG5_RV | TTCGCTGCAGAGTCCTGATG  | 20                 | 55             | 60.11   | 163                |
| <i>NUF2</i>  | NUF2_FW  | AACAGTTAAACGCCGCACAC  | 20                 | 50             | 59.97   | 168                |
|              | NUF2_RV  | TTCCCTCTTGCAGCACTATCG | 21                 | 52.38          | 60.13   | 168                |
| <i>BUB1B</i> | BUB1B_FW | TGGGTCCTTCTGGAACTTAGC | 22                 | 50             | 59.96   | 100                |
|              | BUB1B_RV | GGCCTCATCATTGGCATTGAG | 21                 | 52.38          | 59.66   | 100                |
| <i>KIF14</i> | KIF14_FW | TTTTGCAGGGATGCTGTTTGG | 21                 | 47.62          | 59.93   | 109                |
|              | KIF14_RV | AGAACTGCTAACTGCCCCAC  | 20                 | 55             | 59.96   | 109                |
| <i>FANCI</i> | FANCI_FW | GAGCACTCCTGAGAGCCATC  | 20                 | 60             | 59.90   | 111                |
|              | FANCI_RV | AATCCCCCGATTCCACCAAC  | 20                 | 55             | 60.03   | 111                |
| <i>ACTB</i>  | ACTB_FW  | CACACTGTGCCCATCTACGA  | 20                 | 55             | 61      | 199                |
|              | ACTB_RV  | TAGCTCTTCTCCAGGGAGGA  | 20                 | 55             | 60.5    | 199                |
